# Supplementary material for: Rapid and simple preparation of a reagentless glucose electrochemical biosensor
Source: Royal Society of Chemistry journal article supplement (doi:10.1039/c2an35128e), 2012-01-01
Supplement: c2an35128e.pdf [file c2an35128e.pdf]

# Rapid and simple preparation of a reagentless glucose electrochemical biosensor†

*Dan Zheng,<sup>a,b,‡</sup> Sandeep Kumar Vashist,<sup>a,c,‡</sup> Khalid Al-Rubeaan,<sup>d</sup> John H.T. Luong<sup>a,e</sup> and Fwu-Shan Sheu<sup>\*,a,c</sup>*

<sup>a</sup>NUSNNI-NanoCore, National University of Singapore, T-Lab Level 11, 5A Engineering Drive 1, Singapore 117580

<sup>b</sup>Department of Chemistry, National University of Singapore, 3 Science Drive 3, Singapore 117543

<sup>c</sup>Department of Electrical and Computer Engineering, National University of Singapore, Engineering Drive 1, Singapore 117576

<sup>d</sup>University Diabetes Center, King Saud University, P. O. Box 18397, Riyadh 11415, Kingdom of Saudi Arabia

<sup>e</sup>Biotechnology Research Institute, National Research Council Canada, Montreal, Quebec, Canada H4P 2R2

\* Corresponding author. Tel: +65 65162857; Fax: +65 68725563. E-mail address: [elesfs@nus.edu.sg](mailto:elesfs@nus.edu.sg) (F.-S. Sheu).

† These authors contributed equally to this work.

**Supplementary Table S1.** Comparison of the developed glucose biosensing method in present study with other published glucose biosensing formats.

| EC glucose biosensing strategies                   | Preparation time (in hours) | EC method, Applied Pot. (vs. Ag/AgCl, if not specified) | Linear Range (Dynamic Range, in mM) | Interference study                                                                                                                                                                                                                                                                                               | Real sample testing                                                          | Storage stability                                                                                                          | Reference                    |
|----------------------------------------------------|-----------------------------|---------------------------------------------------------|-------------------------------------|------------------------------------------------------------------------------------------------------------------------------------------------------------------------------------------------------------------------------------------------------------------------------------------------------------------|------------------------------------------------------------------------------|----------------------------------------------------------------------------------------------------------------------------|------------------------------|
| Nafion/APTES-GOx/GCE                               | ~ 1.5 hrs                   | Amperometry, -0.45 V                                    | 0.5 - 48                            | Negligible interference from physiological levels of interfering substances, (for pathophysiological levels of interferents, ~8% false current signal was observed by the injection of 1.1 mM uric acid, 3.62 mM salicylate and 3.7 mM tolbutamide, while <4% extra signal was observed for 1.7 mM ascorbic acid | It detects 1.3 – 28.2 mM Streck Sugar-Chex blood glucose linearity standards | There was no decrease in glucose detection response when the developed biosensor was stored at RT in dry state for 4 weeks | Mentioned in this manuscript |
| GOx immobilized on poly-ethylenedioxythiophene-NiO | > 24 hrs                    | Amperometry, -0.45 V                                    | Up to 1.5                           | N.M.                                                                                                                                                                                                                                                                                                             | N.M.                                                                         | N.M.                                                                                                                       | S1                           |

|                                                                               |          |                                    |           |                                                                                                                       |                                        |                                                                |    |
|-------------------------------------------------------------------------------|----------|------------------------------------|-----------|-----------------------------------------------------------------------------------------------------------------------|----------------------------------------|----------------------------------------------------------------|----|
| nanocomposites                                                                |          |                                    |           |                                                                                                                       |                                        |                                                                |    |
| GOx immobilized on hierarchically structured one-dimensional TiO <sub>2</sub> | > 24 hrs | Amperometry, -0.45 V               | Up to 1.5 | Negligible effect from 0.3 mM ascorbic acid, 0.2 mM dopamine and 0.5 mM uric acid for the detection of 0.6 mM glucose | N.M.                                   | 91.2% activity is retained after two weeks when stored at 4 °C | S2 |
| GOx in Nafion on MWCNTs-AuNPs/GCE                                             | >12 hrs  | Amperometry, N.M.                  | 0.05-22   | N.M.                                                                                                                  | N.M.                                   | N.M.                                                           | S3 |
| PdNP-SWCNT hybrid nanostructures on GCE                                       | >12 hrs  | Amperometry, -0.35 V               | 0.5-17    | When the detection potential is more positive than -0.35 V, the interferences from UA, AA, and DOPAC are significant  | Detect up to 10.56 mM of blood glucose | N.M.                                                           | S4 |
| GOx/PVP-protected graphene-PFIL/GCE                                           | > 48 hrs | Amperometry, -0.49 V               | 2 - 14    | N.A.                                                                                                                  | N.A.                                   | Stable for one week                                            | S5 |
| GOx/APTES/ER-graphene oxide/GCE                                               | >36 hrs  | Cyclic voltammetry, -0.6 to +0.4 V | 0 - 24    | N.A.                                                                                                                  | N.A.                                   | N.A.                                                           | S6 |

|                                                             |         |                                    |          |                                                                                                  |                                                                                                                     |                                                                                  |    |
|-------------------------------------------------------------|---------|------------------------------------|----------|--------------------------------------------------------------------------------------------------|---------------------------------------------------------------------------------------------------------------------|----------------------------------------------------------------------------------|----|
| Nafion-GOx-graphene-CdS/GCE                                 | >24 hrs | Cyclic voltammetry, -0.7 to -0.1 V | 2 - 16   | Negligible interference from 0.1 mM ascorbic acid and 0.5 mM uric acid, relative to 5 mM glucose | Recovery test were done in human plasma sample by adding 1 mM and 2 mM glucose, with recoveries of 92.2% and 105.1% | At 4 °C in 0.05 M PBS, 93% of the initial response was retained after four weeks | S7 |
| GOx/poly(ViBuIm <sup>+</sup> Br <sup>-</sup> )-graphene/GCE | >48 hrs | Cyclic voltammetry, -0.7 to -0.1 V | 0.8 - 20 | N.A.                                                                                             | N.A.                                                                                                                | At 4 °C in PBS (pH 6.5), 80% of initial response was retained after three weeks  | S8 |
| GOx self-assembled on CS-graphene/GCE                       | >12 hrs | Amperometry, -0.79 V               | 2 - 22   | N.A.                                                                                             | N.A.                                                                                                                | N.A.                                                                             | S9 |



**Supplementary Table S2.** Stability of the developed Nafion/APTES-GOx/GCEs stored under various conditions.

| Signal Strength           | RT dry               | RT in 50 mM PBS, pH 7.4 | 4°C dry              | 4°C in 50 mM PBS, pH 7.4 |
|---------------------------|----------------------|-------------------------|----------------------|--------------------------|
| <i>No dec. in signal</i>  | 27 <sup>th</sup> day | 20 <sup>th</sup> day    | Dec. continuously    | 23 <sup>rd</sup> day     |
| <i>20% dec. in signal</i> | 40 <sup>th</sup> day | 38 <sup>th</sup> day    | 15 <sup>th</sup> day | 33 <sup>rd</sup> day     |
| <i>50% dec. in signal</i> | 62 <sup>nd</sup> day | 61 <sup>st</sup> day    | 38 <sup>th</sup> day | 60 <sup>th</sup> day     |

## References

- S1 C. X. Guo and C. M. Li, *Phys. Chem. Chem. Phys.*, 2010, **12**, 12156.
- S2 P. Si, S. Ding, J. Yuan, X. W. Lou and D.-H. Kim, *ACS Nano*, 2011, **9**, 7617.
- S3 R. B. Rakhi, K. Sethupathi and S. J. Ramaprabhu, *Phys. Chem. B*, 2009, **113**, 3190.
- S4 L. Meng, J. Jin, G. X. Yang, T. H. Lu, H. Zhang, C. X. Cai, *Anal. Chem.*, 2009, **81**, 7271.
- S5 C. Shan, H. Yang, J. Song, D. Han, A. Ivaska and L. Niu, *Anal. Chem.*, 2009, **81**, 2378.
- S6 Z. Wang, X. Zhou, J. Zhang, F. Boey and H. Zhang, *J. Phys. Chem. C*, 2009, **113**, 14071.
- S7 K. Wang, Q. Liu, Q. M. Guan, J. Wu, H. N. Li and J. J. Yan, *Biosens. Bioelectron.*, 2011, **26**, 2252.
- S8 Q. Zhang, S. Wu, L. Zhang, J. Lu, F. Verproot, Y. Liu, Z. Xing, J. Li and X. M. Song, *Biosens. Bioelectron.*, 2011, **26**, 2632.
- S9 S. Liu, J. Tian, L. Wang, Y. Luo, W. Lu and X. Sun, *Biosens. Bioelectron.*, 2011, **26**, 4491.
